# Supplementary material for: Safety Evaluation and Probiotic Potency Screening of Akkermansia muciniphila Strains Isolated from Human Feces and Breast Milk
Source: PubMed Central journal article supplement (PMC10103750; doi:10.1128/spectrum.03361-22), 2023-02-14
Supplement: spectrum.03361-22-s0001.pdf [file spectrum.03361-22-s0001.pdf]

**Fig. S1**

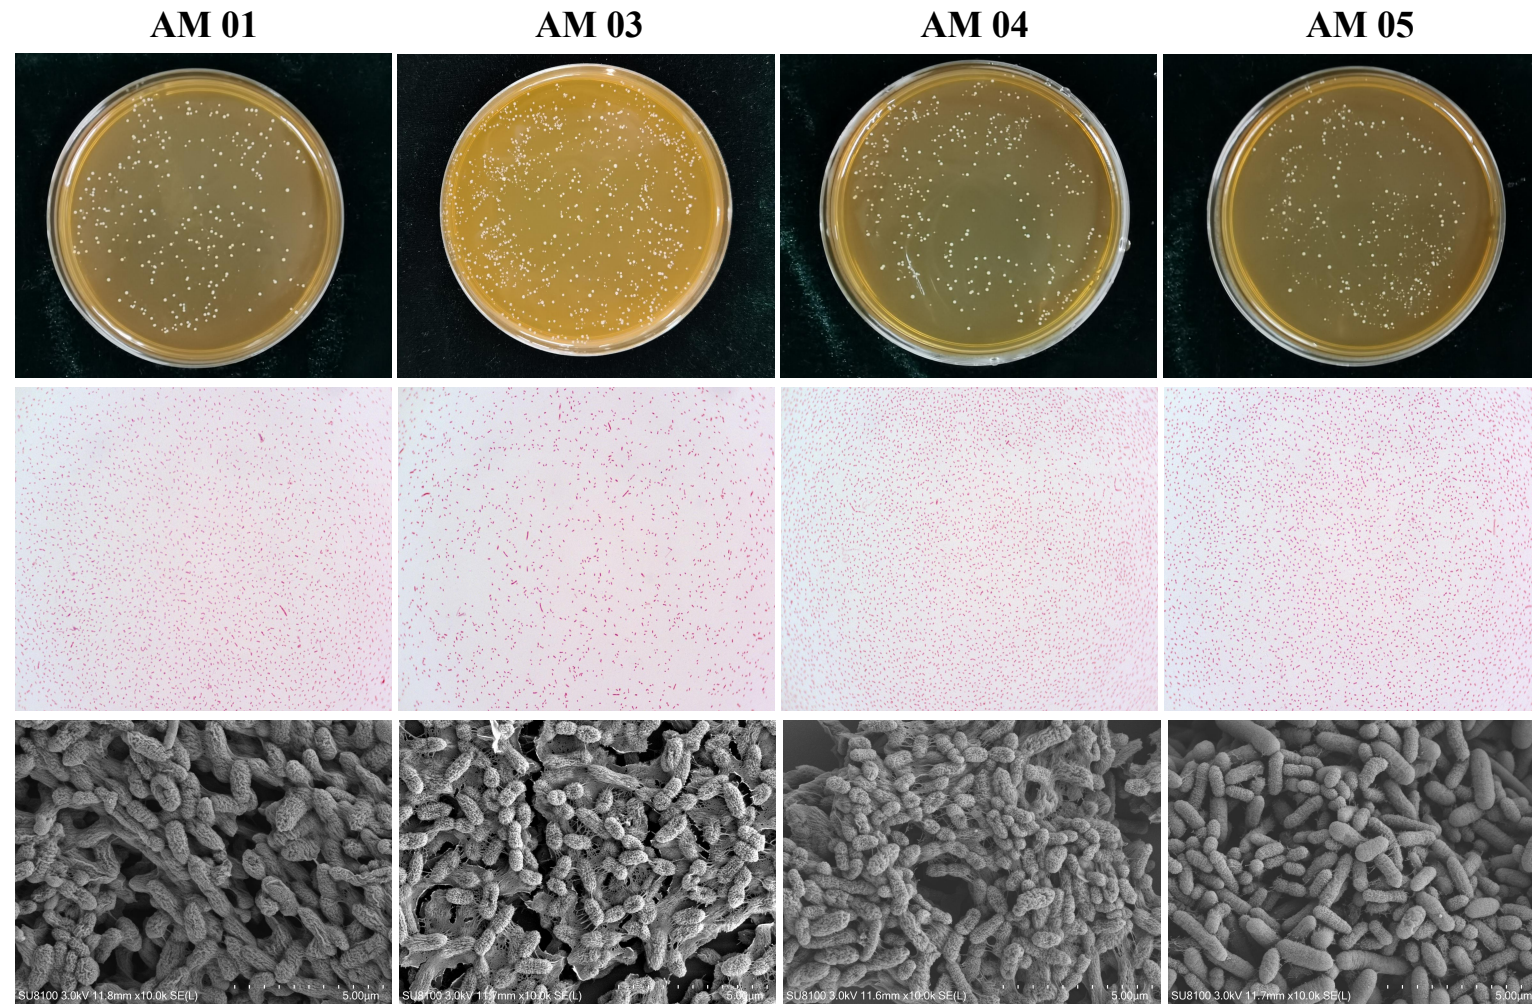

**Figure S1.** Bacterial colonies on agar medium, gram staining under the optical microscope, and morphological characteristics of bacterial cells under the scanning electron microscope of *A. muciniphila* AM01 and AM03–05.

**Fig. S2**

**(A)**

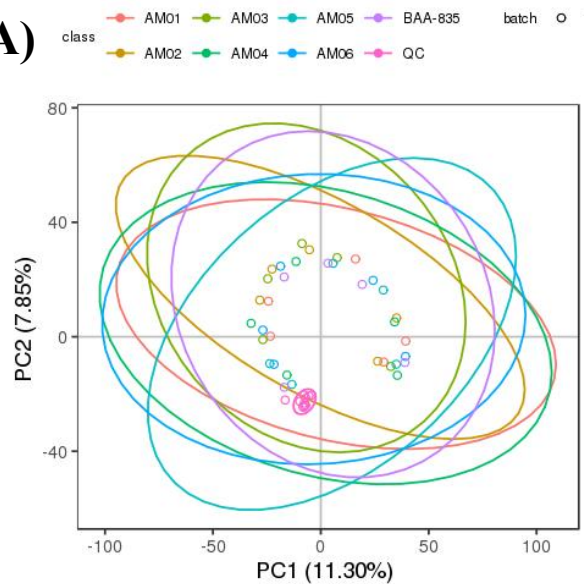

**(B)**

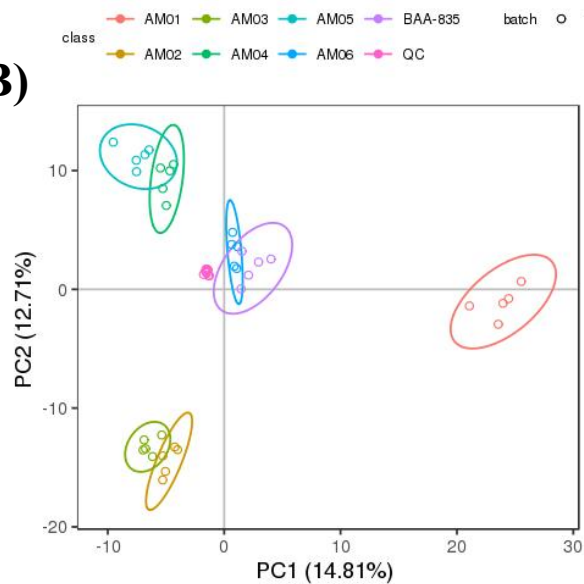

**(C)**

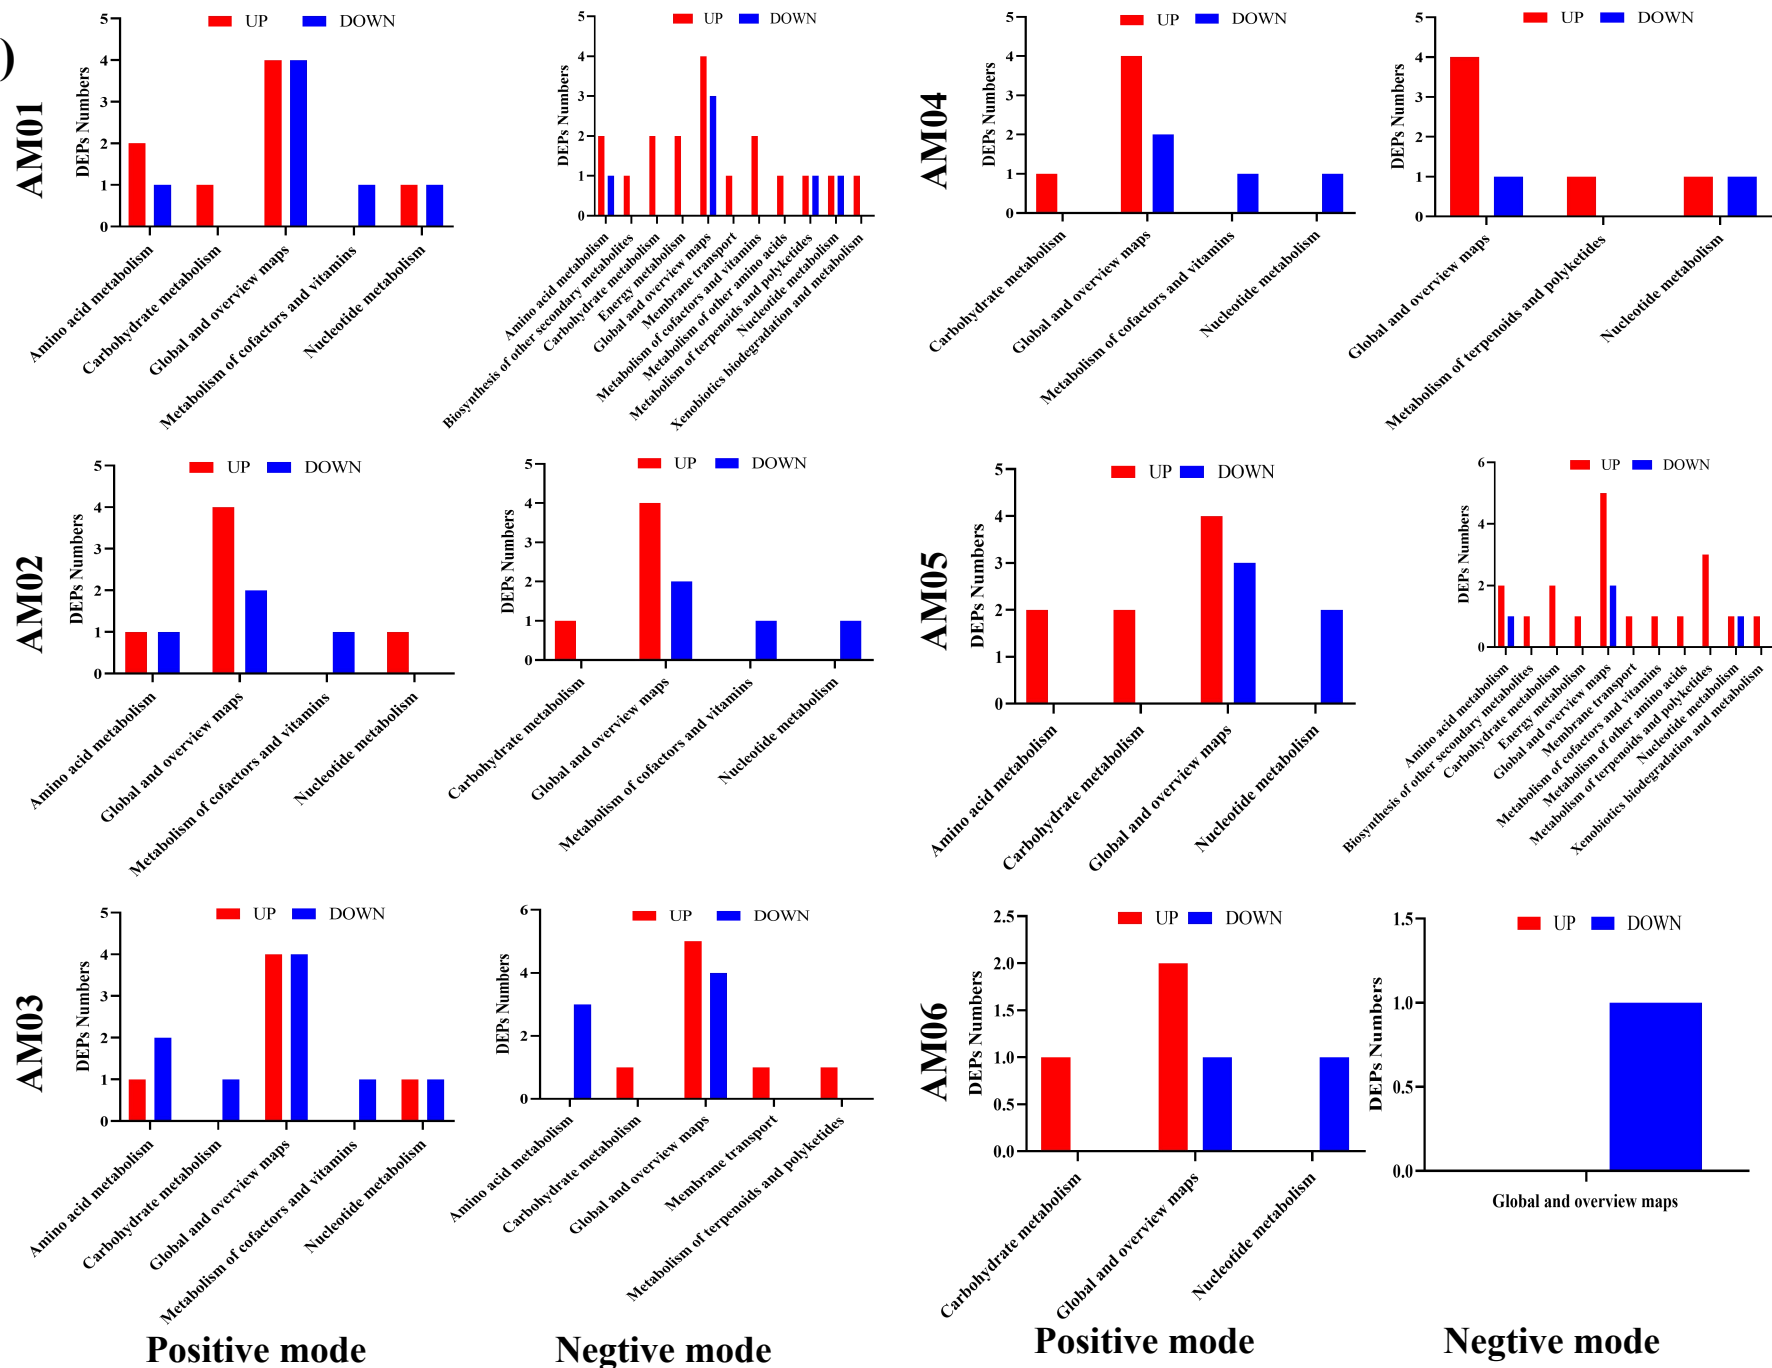

**Figure S2.** Major components of the culture supernatant of *A. muciniphila* AM01–06 and *A. muciniphila* ATCC BAA-835 under positive mode (A) and negative mode (B). (C) Differential metabolite pathways between *A. muciniphila* AM01–06 and *A. muciniphila* ATCC BAA-835.
